# Supplementary material for: Selective intraoperative cholangiography should be considered over routine intraoperative cholangiography during cholecystectomy: a systematic review and meta-analysis
Source: PubMed Central journal article supplement (PMC9485186; doi:10.1007/s00464-022-09267-x), 2022-07-07
Supplement: 464_2022_9267_MOESM57_ESM.pdf [file 464_2022_9267_MOESM57_ESM.pdf]

# Selective intraoperative cholangiography should be considered over routine intraoperative cholangiography during cholecystectomy: A systematic review and meta-analysis

**Aim:** to review and analyse the available literature on the benefits of IOC during cholecystectomy

38 eligible articles  
3,747,695 patients

## Population:

Patients after cholecystectomy

- *Open*

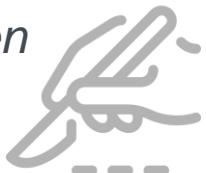

- *Laparoscopic*

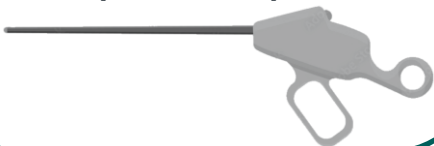

## Main results

### *Bile duct injury*

#### **Routine IOC vs Selective IOC**

RR= 0.91, 95% CI: 0.66; 1.24

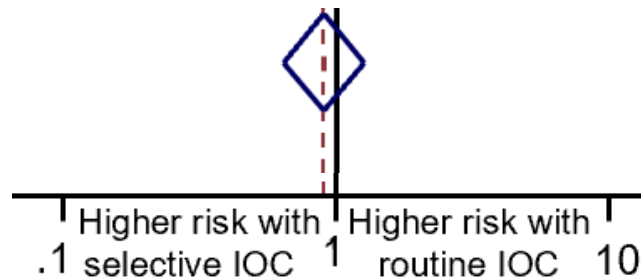

#### **IOC vs non-IOC**

RR= 1.03, 95% CI: 0.77; 1.37

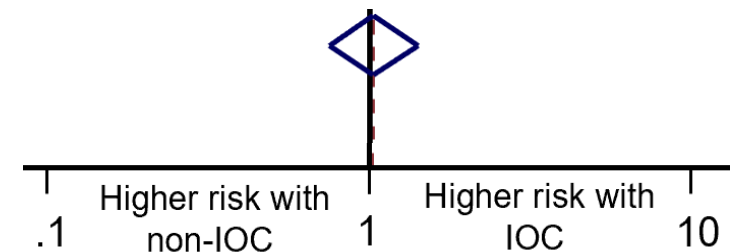

**Conclusion:** IOC might not be indicated in every case, and selective use may stand as an alternative to routine policy
